# Supplementary material for: Human–Wildlife Interaction—A Social Survey
Source: MDPI journal article supplement (doi:10.3390/ani14050808), 2024-03-05
Supplement: s1 [file s1]

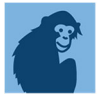

Article

# Human-Wildlife-Interaction – A Social Survey

Lara-Luisa Grundei <sup>1†</sup>, Franziska M. Schöttes <sup>2†</sup>, Friederike Gethöffer <sup>2,\*</sup>, Daniel Tost <sup>2</sup>, Laurin Kluge <sup>1</sup>, Ursula Siebert <sup>2</sup> and Michael Pees <sup>1</sup>

<sup>1</sup> Department of Small Mammal, Reptile and Avian Medicine and Surgery, University of Veterinary Medicine Hanover, Hanover, Germany

<sup>2</sup> Institute for Terrestrial and Aquatic Wildlife Research, University of Veterinary Medicine Hannover, Foundation, Bischofsholer Damm 15, 30173 Hannover, Germany

\* Correspondence: [friederike.gethoeffler@tiho-hannover.de](mailto:friederike.gethoeffler@tiho-hannover.de)

<sup>†</sup> These authors contributed equally to this work.

## Supplementary material

**Table S1.** Output of questionnaire used for this study.

| Questionnaire section | Quest. number | Used for score | Question                           | Question type                              | n    | Answer options            | Answers given                   |
|-----------------------|---------------|----------------|------------------------------------|--------------------------------------------|------|---------------------------|---------------------------------|
| Personal data         | A2            | -              | What is your gender?               | Single choice                              | 1569 | Male                      | 26.7%                           |
|                       |               |                |                                    |                                            |      | Female                    | 71.3%                           |
|                       |               |                |                                    |                                            |      | Diverse                   | 0.8%                            |
|                       |               |                |                                    |                                            |      | N/A (no answer)           | 1.2%                            |
|                       | A3            | -              | What is your year of birth?        | Free text                                  | 1497 | Number field              | <b>Age in %</b><br><b>years</b> |
|                       |               |                |                                    |                                            |      |                           | <20 1.3                         |
|                       |               |                |                                    |                                            |      |                           | 20–39 36.1                      |
|                       |               |                |                                    |                                            |      |                           | 40–59 41.6                      |
|                       |               |                |                                    |                                            |      |                           | >60 16.4                        |
|                       |               |                |                                    |                                            |      |                           | N/A 4.6                         |
|                       | A4            | -              | Where do you live?                 | Single choice                              | 1569 | I live in Germany         | 97.8%                           |
|                       |               |                |                                    |                                            |      | I live outside of Germany | 1.8%                            |
|                       |               |                |                                    |                                            |      | N/A                       | 0.4%                            |
|                       | A4a1          | -              | What is the ZIP code of your town? | Free text, follow-up question, if A4a1 was | 1533 | Number field              | <b>Residence %</b>              |
|                       |               |                |                                    |                                            |      |                           | <5000 inhabitants 9.7           |

|      |   |                                                               |                                                                  |                                   |                             |                             |      |
|------|---|---------------------------------------------------------------|------------------------------------------------------------------|-----------------------------------|-----------------------------|-----------------------------|------|
|      |   |                                                               |                                                                  | answered with "I live in Germany" |                             | 5000≤10,000 inhabitants     | 10.6 |
|      |   |                                                               |                                                                  |                                   |                             | 10,000≤20,000 inhabitants   | 15.8 |
|      |   |                                                               |                                                                  |                                   |                             | 20,000≤50,000 inhabitants   | 21.0 |
|      |   |                                                               |                                                                  |                                   |                             | 50,000≤100,000 inhabitants  | 9.6  |
|      |   |                                                               |                                                                  |                                   |                             | 100,000≤500,000 inhabitants | 9.8  |
|      |   |                                                               |                                                                  |                                   |                             | >500,000 inhabitants        | 14.6 |
|      |   |                                                               |                                                                  |                                   |                             | N/A                         | 8.9  |
| A5   | - | Do you work with (wild) animals?                              | Single choice                                                    | 1569                              | Yes                         | 41.3%                       |      |
|      |   |                                                               |                                                                  |                                   | No                          | 56.5%                       |      |
|      |   |                                                               |                                                                  |                                   | N/A                         | 2.2%                        |      |
| A5a1 | - | Which professional background is most likely to apply to you? | Single choice, follow-up question, if A5 was answered with "yes" | 648                               | Veterinary medicine /care   | 55.7%                       |      |
|      |   |                                                               |                                                                  |                                   | Nature/species conservation | 12.4%                       |      |
|      |   |                                                               |                                                                  |                                   | Public authority            | 3.2%                        |      |
|      |   |                                                               |                                                                  |                                   | Hunting/forestry            | 10.3%                       |      |
|      |   |                                                               |                                                                  |                                   | Agriculture                 | 2.8%                        |      |
|      |   |                                                               |                                                                  |                                   | Natural science research    | 4.8%                        |      |
|      |   |                                                               |                                                                  |                                   | Other                       | 9.9%                        |      |

|                                                                                     |      |   |                                                               |                                                                   |      |                                                                                                                                                                                                                                                                                                  |
|-------------------------------------------------------------------------------------|------|---|---------------------------------------------------------------|-------------------------------------------------------------------|------|--------------------------------------------------------------------------------------------------------------------------------------------------------------------------------------------------------------------------------------------------------------------------------------------------|
|                                                                                     |      |   |                                                               |                                                                   | N/A  | 0.9%                                                                                                                                                                                                                                                                                             |
|                                                                                     | A5a2 | - | Which professional background is most likely to apply to you? | Free text, follow-up question, if A5a1 was answered with „other“. | 64   | Free text                                                                                                                                                                                                                                                                                        |
|                                                                                     | A7   | - | Do you own a hunting license?                                 | Single choice                                                     | 1569 | Yes, I hunt professionally. 1.9%<br>Yes, I hunt privately. 15.7%<br>Yes, but I am not active. 5.7%<br>No, I don't own a hunting license. 76.0%<br>N/A 0.7%                                                                                                                                       |
|                                                                                     | A6   | - | Do you do voluntary work with (wild) animals?                 | Single choice                                                     | 1569 | Yes 43.1%<br>No 54.1%<br>N/A 2.8%                                                                                                                                                                                                                                                                |
| <b>Knowledge</b><br><b>(r = right answer,</b><br><b>w = wrong</b><br><b>answer)</b> | B2   | - | What applies if an animal is subject to hunting laws?         | Multiple choice                                                   | 1569 | If an injured animal is found, the hunter in charge must be informed. (r) 89.6%<br>If an injured animal is found, the animal may be taken to a veterinary practice without notifying the hunter in charge. (w) 10.7%<br>Taking an animal with you is a punishable offence. (r) 51.1%<br>N/A 1.1% |

|    |    |                                                                                                                  |                 |      |                                                                |       |              |
|----|----|------------------------------------------------------------------------------------------------------------------|-----------------|------|----------------------------------------------------------------|-------|--------------|
| B3 | KS | Who is legally responsible for an injured wild animal that is not subject to hunting laws?                       | Single choice   | 1569 | The person who finds and takes the animal (r)                  | 39.4% |              |
|    |    |                                                                                                                  |                 |      | Veterinary Office (w)                                          | 31.6% |              |
|    |    |                                                                                                                  |                 |      | Veterinarians (w)                                              | 3.4%  |              |
|    |    |                                                                                                                  |                 |      | Fire brigade (w)                                               | 3.1%  |              |
|    |    |                                                                                                                  |                 |      | Police (w)                                                     | 10.5% |              |
|    |    |                                                                                                                  |                 |      | Animal shelter (w)                                             | 4.2%  |              |
|    |    |                                                                                                                  |                 |      | N/A                                                            | 7.8%  |              |
| B4 | KS | When is it legal to take a wild animal from the wild?                                                            | Multiple choice | 1569 | For permanent care when it would no longer cope in nature (w). | 29.4% |              |
|    |    |                                                                                                                  |                 |      | For optimal, more pleasant wintering.(w)                       | 3.6%  |              |
|    |    |                                                                                                                  |                 |      | For health care and reintroduction into the wild. (r)          | 94.1% |              |
|    |    |                                                                                                                  |                 |      | If the animal is in danger from predators. (w)                 | 2.1%  |              |
|    |    |                                                                                                                  |                 |      | N/A                                                            | 2.0%  |              |
| B5 | -  | Who in Germany mainly pays for the care/treatment of native wild animals? Sort the following terms in descending | Ranking 1-5     | 1569 | Private persons                                                | 3.4   | average rank |
|    |    |                                                                                                                  |                 |      | Veterinarians                                                  | 2.9   | average rank |
|    |    |                                                                                                                  |                 |      | Wildlife sanctuaries and associations                          | 4.6   | average rank |
|    |    |                                                                                                                  |                 |      | State                                                          | 1.7   | average rank |
|    |    |                                                                                                                  |                 |      | Municipality                                                   | 2.5   | average rank |

|                                   |       |     |                                                                                                                              |                 |      |                                                                                                                                                                                                                                                                                                                                                                                                                                                                                                            |                         |       |                          |       |                                   |       |                                   |       |                     |       |                        |       |                   |       |                              |       |     |      |
|-----------------------------------|-------|-----|------------------------------------------------------------------------------------------------------------------------------|-----------------|------|------------------------------------------------------------------------------------------------------------------------------------------------------------------------------------------------------------------------------------------------------------------------------------------------------------------------------------------------------------------------------------------------------------------------------------------------------------------------------------------------------------|-------------------------|-------|--------------------------|-------|-----------------------------------|-------|-----------------------------------|-------|---------------------|-------|------------------------|-------|-------------------|-------|------------------------------|-------|-----|------|
|                                   |       |     | order from high to low financial expenditure:                                                                                |                 |      |                                                                                                                                                                                                                                                                                                                                                                                                                                                                                                            |                         |       |                          |       |                                   |       |                                   |       |                     |       |                        |       |                   |       |                              |       |     |      |
|                                   | B6    | KS  | Are veterinarians obliged to treat wild animals free of charge?                                                              | Single choice   | 1569 | <table><tr><td>Yes (w)</td><td>5.2%</td></tr><tr><td>In case of emergency (w)</td><td>23.0%</td></tr><tr><td>No (r)</td><td>68.3%</td></tr><tr><td>N/A</td><td>3.5%</td></tr></table>                                                                                                                                                                                                                                                                                                                      | Yes (w)                 | 5.2%  | In case of emergency (w) | 23.0% | No (r)                            | 68.3% | N/A                               | 3.5%  |                     |       |                        |       |                   |       |                              |       |     |      |
| Yes (w)                           | 5.2%  |     |                                                                                                                              |                 |      |                                                                                                                                                                                                                                                                                                                                                                                                                                                                                                            |                         |       |                          |       |                                   |       |                                   |       |                     |       |                        |       |                   |       |                              |       |     |      |
| In case of emergency (w)          | 23.0% |     |                                                                                                                              |                 |      |                                                                                                                                                                                                                                                                                                                                                                                                                                                                                                            |                         |       |                          |       |                                   |       |                                   |       |                     |       |                        |       |                   |       |                              |       |     |      |
| No (r)                            | 68.3% |     |                                                                                                                              |                 |      |                                                                                                                                                                                                                                                                                                                                                                                                                                                                                                            |                         |       |                          |       |                                   |       |                                   |       |                     |       |                        |       |                   |       |                              |       |     |      |
| N/A                               | 3.5%  |     |                                                                                                                              |                 |      |                                                                                                                                                                                                                                                                                                                                                                                                                                                                                                            |                         |       |                          |       |                                   |       |                                   |       |                     |       |                        |       |                   |       |                              |       |     |      |
|                                   | B7    | KS  | Which of the following diseases belong to zoonoses? (Zoonoses = diseases that can be transmitted between animals and humans) | Multiple choice | 1569 | <table><tr><td>African Swine Fever (w)</td><td>18.7%</td></tr><tr><td>Rabies (r)</td><td>91.5%</td></tr><tr><td>Echinococcosis (fox tapeworm) (r)</td><td>86.3%</td></tr><tr><td>Dermatophytosis (skin fungus) (r)</td><td>62.5%</td></tr><tr><td>Scabies (Mites) (r)</td><td>52.6%</td></tr><tr><td>Aujeszký's Disease (w)</td><td>11.6%</td></tr><tr><td>Leptospirosis (r)</td><td>38.4%</td></tr><tr><td>Tularemia (rabbit fever) (r)</td><td>35.0%</td></tr><tr><td>N/A</td><td>3.2%</td></tr></table> | African Swine Fever (w) | 18.7% | Rabies (r)               | 91.5% | Echinococcosis (fox tapeworm) (r) | 86.3% | Dermatophytosis (skin fungus) (r) | 62.5% | Scabies (Mites) (r) | 52.6% | Aujeszký's Disease (w) | 11.6% | Leptospirosis (r) | 38.4% | Tularemia (rabbit fever) (r) | 35.0% | N/A | 3.2% |
| African Swine Fever (w)           | 18.7% |     |                                                                                                                              |                 |      |                                                                                                                                                                                                                                                                                                                                                                                                                                                                                                            |                         |       |                          |       |                                   |       |                                   |       |                     |       |                        |       |                   |       |                              |       |     |      |
| Rabies (r)                        | 91.5% |     |                                                                                                                              |                 |      |                                                                                                                                                                                                                                                                                                                                                                                                                                                                                                            |                         |       |                          |       |                                   |       |                                   |       |                     |       |                        |       |                   |       |                              |       |     |      |
| Echinococcosis (fox tapeworm) (r) | 86.3% |     |                                                                                                                              |                 |      |                                                                                                                                                                                                                                                                                                                                                                                                                                                                                                            |                         |       |                          |       |                                   |       |                                   |       |                     |       |                        |       |                   |       |                              |       |     |      |
| Dermatophytosis (skin fungus) (r) | 62.5% |     |                                                                                                                              |                 |      |                                                                                                                                                                                                                                                                                                                                                                                                                                                                                                            |                         |       |                          |       |                                   |       |                                   |       |                     |       |                        |       |                   |       |                              |       |     |      |
| Scabies (Mites) (r)               | 52.6% |     |                                                                                                                              |                 |      |                                                                                                                                                                                                                                                                                                                                                                                                                                                                                                            |                         |       |                          |       |                                   |       |                                   |       |                     |       |                        |       |                   |       |                              |       |     |      |
| Aujeszký's Disease (w)            | 11.6% |     |                                                                                                                              |                 |      |                                                                                                                                                                                                                                                                                                                                                                                                                                                                                                            |                         |       |                          |       |                                   |       |                                   |       |                     |       |                        |       |                   |       |                              |       |     |      |
| Leptospirosis (r)                 | 38.4% |     |                                                                                                                              |                 |      |                                                                                                                                                                                                                                                                                                                                                                                                                                                                                                            |                         |       |                          |       |                                   |       |                                   |       |                     |       |                        |       |                   |       |                              |       |     |      |
| Tularemia (rabbit fever) (r)      | 35.0% |     |                                                                                                                              |                 |      |                                                                                                                                                                                                                                                                                                                                                                                                                                                                                                            |                         |       |                          |       |                                   |       |                                   |       |                     |       |                        |       |                   |       |                              |       |     |      |
| N/A                               | 3.2%  |     |                                                                                                                              |                 |      |                                                                                                                                                                                                                                                                                                                                                                                                                                                                                                            |                         |       |                          |       |                                   |       |                                   |       |                     |       |                        |       |                   |       |                              |       |     |      |
| Experience                        | C2    | ExS | What kind of encounters have you had with wildlife so far?                                                                   | Multiple choice | 1569 | <table><tr><td>Observation</td><td>97.6%</td></tr><tr><td>Feeding</td><td>63.9%</td></tr><tr><td>Touch</td><td>65.0%</td></tr><tr><td>Damage</td><td>27.3%</td></tr><tr><td>Zoonosis</td><td>6.6%</td></tr><tr><td>Attack</td><td>6.2%</td></tr><tr><td>Harassment</td><td>7.8%</td></tr></table>                                                                                                                                                                                                          | Observation             | 97.6% | Feeding                  | 63.9% | Touch                             | 65.0% | Damage                            | 27.3% | Zoonosis            | 6.6%  | Attack                 | 6.2%  | Harassment        | 7.8%  |                              |       |     |      |
| Observation                       | 97.6% |     |                                                                                                                              |                 |      |                                                                                                                                                                                                                                                                                                                                                                                                                                                                                                            |                         |       |                          |       |                                   |       |                                   |       |                     |       |                        |       |                   |       |                              |       |     |      |
| Feeding                           | 63.9% |     |                                                                                                                              |                 |      |                                                                                                                                                                                                                                                                                                                                                                                                                                                                                                            |                         |       |                          |       |                                   |       |                                   |       |                     |       |                        |       |                   |       |                              |       |     |      |
| Touch                             | 65.0% |     |                                                                                                                              |                 |      |                                                                                                                                                                                                                                                                                                                                                                                                                                                                                                            |                         |       |                          |       |                                   |       |                                   |       |                     |       |                        |       |                   |       |                              |       |     |      |
| Damage                            | 27.3% |     |                                                                                                                              |                 |      |                                                                                                                                                                                                                                                                                                                                                                                                                                                                                                            |                         |       |                          |       |                                   |       |                                   |       |                     |       |                        |       |                   |       |                              |       |     |      |
| Zoonosis                          | 6.6%  |     |                                                                                                                              |                 |      |                                                                                                                                                                                                                                                                                                                                                                                                                                                                                                            |                         |       |                          |       |                                   |       |                                   |       |                     |       |                        |       |                   |       |                              |       |     |      |
| Attack                            | 6.2%  |     |                                                                                                                              |                 |      |                                                                                                                                                                                                                                                                                                                                                                                                                                                                                                            |                         |       |                          |       |                                   |       |                                   |       |                     |       |                        |       |                   |       |                              |       |     |      |
| Harassment                        | 7.8%  |     |                                                                                                                              |                 |      |                                                                                                                                                                                                                                                                                                                                                                                                                                                                                                            |                         |       |                          |       |                                   |       |                                   |       |                     |       |                        |       |                   |       |                              |       |     |      |

|      |     |                                                                                            |                                                                  |      |                                     |                                           |                                        |                           |
|------|-----|--------------------------------------------------------------------------------------------|------------------------------------------------------------------|------|-------------------------------------|-------------------------------------------|----------------------------------------|---------------------------|
|      |     |                                                                                            |                                                                  |      | I have not had an encounter.        | 0.3%                                      |                                        |                           |
|      |     |                                                                                            |                                                                  |      | N/A                                 | 0.2%                                      |                                        |                           |
| C2d1 | -   | Which animal species caused this damage?                                                   | Free text, follow-up question if "Damage" was chosen in C2.      | 416  | Free text                           | Mostly wild boar                          |                                        |                           |
| C2e1 | -   | Which zoonoses were involved?                                                              | Free text, follow-up question if "Zoonosis" was chosen in C2.    | 93   | Free text                           | Mostly ectoparasites                      |                                        |                           |
| C2f1 | -   | By which animal species were you attacked?                                                 | Free text, follow-up question, if "Attack" was chosen in C2      | 94   | Free text                           | Mostly mammals                            |                                        |                           |
| C2g1 | -   | Which animal species were you harassed by?                                                 | Free text, follow-up question if "Harrassment" was chosen in C2. | 117  | Free text                           | Mostly insects, mammals, birds, predatory |                                        |                           |
| C3   | ExS | Have you ever found a wild animal in need of help?                                         | Single choice                                                    | 1569 | Yes                                 | 73.0%                                     |                                        |                           |
|      |     |                                                                                            |                                                                  |      | No                                  | 26.6%                                     |                                        |                           |
|      |     |                                                                                            |                                                                  |      | N/A                                 | 0.4%                                      |                                        |                           |
| C3a1 | ExS | You stated that you have found a wild animal in need of help once or several times. Please | Matrix, follow-up question if C3 was answered with „yes“.        | 1146 | <b>Animal group</b>                 | <b>Taken care of by myself (%)</b>        | <b>Handed over to a specialist (%)</b> | <b>Left in nature (%)</b> |
|      |     |                                                                                            |                                                                  |      | Canines (e.g., foxes, raccoon dogs) | 8.3                                       | 15.1                                   | 14.1                      |

|         |    |     |                                                                            |     |                                                                                                                             |                                  |                                                            |                                                       |      |        |      |
|---------|----|-----|----------------------------------------------------------------------------|-----|-----------------------------------------------------------------------------------------------------------------------------|----------------------------------|------------------------------------------------------------|-------------------------------------------------------|------|--------|------|
|         |    |     |                                                                            |     |                                                                                                                             |                                  | indicate how you reacted for all applicable animal groups. | Felines (e.g., lynxes, wildcats)                      | 1.8  | 9.3    | 9.1  |
|         |    |     |                                                                            |     |                                                                                                                             |                                  |                                                            | Lagomorpha (e.g., brown hares, wild rabbits)          | 13.1 | 17.2   | 12.8 |
|         |    |     |                                                                            |     |                                                                                                                             |                                  |                                                            | Rodents (e.g., mice, dormice)                         | 19.5 | 14.4   | 14.9 |
|         |    |     |                                                                            |     |                                                                                                                             |                                  |                                                            | Insectivores (e.g., hedgehogs)                        | 37.7 | 28.5   | 8.4  |
|         |    |     |                                                                            |     |                                                                                                                             |                                  |                                                            | Songbirds (e.g., swallows, crows)                     | 32.9 | 36.5   | 10.3 |
|         |    |     |                                                                            |     |                                                                                                                             |                                  |                                                            | Birds of prey (e.g., falcons, owls)                   | 8.2  | 31.0   | 5.0  |
|         |    |     |                                                                            |     |                                                                                                                             |                                  |                                                            | Waterfowl (e.g., ducks, geese)                        | 11.9 | 11.9   | 8.6  |
|         |    |     |                                                                            |     |                                                                                                                             |                                  |                                                            | Bats                                                  | 7.6  | 23.3   | 8.6  |
|         |    |     |                                                                            |     |                                                                                                                             |                                  |                                                            | Cloven-hoofed animals (e.g., roe deer, wild boar)     | 9.1  | 12.8   | 10.0 |
|         |    |     |                                                                            |     |                                                                                                                             |                                  |                                                            | Reptiles (e.g., lizards, turtles)                     | 5.2  | 13.5   | 9.6  |
|         |    |     |                                                                            |     |                                                                                                                             |                                  |                                                            | Amphibians (e.g., frogs, toads)                       | 5.9  | 8.0    | 18.6 |
|         |    |     |                                                                            |     |                                                                                                                             |                                  |                                                            | Other                                                 | 6.7  | 9.7    | 8.6  |
| Emotion | C4 | EmS | Rate following the animal species according to your feelings towards them: | the | Matrix: negative (1) / rather negative (2) / partly positive, partly negative (3) / rather positive (4) / very positive (5) | Very (1) / (2) / (3) / (4) / (5) | 1569                                                       | Norway rat ( <i>Rattus norvegicus</i> )               | 3    | median |      |
|         |    |     |                                                                            |     |                                                                                                                             |                                  |                                                            | Feral pigeon ( <i>Columba livia forma domestica</i> ) | 3    | median |      |
|         |    |     |                                                                            |     |                                                                                                                             |                                  |                                                            | Pine marten ( <i>Martes foina</i> )                   | 4    | median |      |
|         |    |     |                                                                            |     |                                                                                                                             |                                  |                                                            | Blue tit ( <i>Cyanistes caeruleus</i> )               | 5    | median |      |
|         |    |     |                                                                            |     |                                                                                                                             |                                  |                                                            | Red squirrel ( <i>Scirurus vulgaris</i> )             | 5    | median |      |
|         |    |     |                                                                            |     |                                                                                                                             |                                  |                                                            | Common crow ( <i>Corvus corone</i> )                  | 4    | median |      |
|         |    |     |                                                                            |     |                                                                                                                             |                                  |                                                            | European hedgehog ( <i>Erinaceus europaeus</i> )      | 5    | median |      |
|         |    |     |                                                                            |     |                                                                                                                             |                                  |                                                            | Common buzzard ( <i>Buteo buteo</i> )                 | 5    | median |      |
|         |    |     |                                                                            |     |                                                                                                                             |                                  |                                                            | Mallard ( <i>Anas platyrhynchos</i> )                 | 5    | median |      |
|         |    |     |                                                                            |     |                                                                                                                             |                                  |                                                            |                                                       |      |        |      |



|         |     |     |                                                                                               |                                                                                                                                        |                                                                                                                                   |                                                                                                          |     |              |
|---------|-----|-----|-----------------------------------------------------------------------------------------------|----------------------------------------------------------------------------------------------------------------------------------------|-----------------------------------------------------------------------------------------------------------------------------------|----------------------------------------------------------------------------------------------------------|-----|--------------|
|         |     |     |                                                                                               |                                                                                                                                        |                                                                                                                                   | Slow worm ( <i>Anguis fragilis</i> )                                                                     | 5   | median       |
|         | C5  | -   | Sort the Ranking 1-9                                                                          | 1569                                                                                                                                   | following interactions in descending order according to your personal attitude and the feeling of happiness associated with them. | Watching a wild animal                                                                                   | 8.1 | average rank |
|         |     |     |                                                                                               |                                                                                                                                        |                                                                                                                                   | Feeding a wild animal                                                                                    | 4.3 | average rank |
|         |     |     |                                                                                               |                                                                                                                                        |                                                                                                                                   | Photographing a wild animal                                                                              | 6.3 | average rank |
|         |     |     |                                                                                               |                                                                                                                                        |                                                                                                                                   | Touching a wild animal                                                                                   | 3.0 | average rank |
|         |     |     |                                                                                               |                                                                                                                                        |                                                                                                                                   | Helping a wild animal in need                                                                            | 6.7 | average rank |
|         |     |     |                                                                                               |                                                                                                                                        |                                                                                                                                   | Donating to conservation programmes                                                                      | 4.3 | average rank |
|         |     |     |                                                                                               |                                                                                                                                        |                                                                                                                                   | Actively helping with conservation programmes                                                            | 5.1 | average rank |
|         |     |     |                                                                                               |                                                                                                                                        |                                                                                                                                   | Getting politically involved in conservation programmes                                                  | 3.7 | average rank |
|         |     |     |                                                                                               |                                                                                                                                        |                                                                                                                                   | Visiting a wildlife park                                                                                 | 4.4 | average rank |
|         | B12 | EmS | To what extent do the following feelings towards some wild animals apply to you? Please rate. | Slider 1-5 (1 = not at all true, 5 = completely true)                                                                                  | 1569                                                                                                                              | Fear of illness/risk of infection                                                                        | 2   | median       |
|         |     |     |                                                                                               |                                                                                                                                        |                                                                                                                                   | Fear of attack                                                                                           | 2   | median       |
|         |     |     |                                                                                               |                                                                                                                                        |                                                                                                                                   | Fear of harassment/harm                                                                                  | 1   | median       |
|         |     |     |                                                                                               |                                                                                                                                        |                                                                                                                                   | Disgust                                                                                                  | 1   | median       |
| Opinion | C8  | OS  | To what extent do you agree with the following statements?                                    | Matrix: I strongly disagree (1) / I disagree (2) / I partly agree and partly disagree(3) / I agree (4) / I strongly agree (5)/ N/A (0) | 1569                                                                                                                              | The care and reintroduction of an injured wild animal makes sense for animal welfare reasons.            | 5   | median       |
|         |     |     |                                                                                               |                                                                                                                                        |                                                                                                                                   | An injured wild animal that cannot be reintroduced to the wild should be euthanised for welfare reasons. | 3   | median       |

|     |    |                                                                                    |                                                            |      |                                                                                                                                                   |                |                   |               |
|-----|----|------------------------------------------------------------------------------------|------------------------------------------------------------|------|---------------------------------------------------------------------------------------------------------------------------------------------------|----------------|-------------------|---------------|
|     |    |                                                                                    |                                                            |      | The keeping of native wild animals in wildlife parks is justified for educational purposes.                                                       | 4              | median            |               |
|     |    |                                                                                    |                                                            |      | The keeping of native wild animals in specialist facilities is justified for species conservation purposes (breeding programmes, reintroduction). | 4              | median            |               |
| C10 | -  | Where do you see the most problems in the interaction between wildlife and humans? | Slider 1-5 (1 = no problems at all, 5 = very big problems) | 1569 | Habitat overlap                                                                                                                                   | 5              | median            |               |
|     |    |                                                                                    |                                                            |      | Damage caused by wild animals                                                                                                                     | 3              | median            |               |
|     |    |                                                                                    |                                                            |      | Transmission of diseases                                                                                                                          | 2              | median            |               |
|     |    |                                                                                    |                                                            |      | Fear/prejudice towards specific wild animals                                                                                                      | 4              | median            |               |
|     |    |                                                                                    |                                                            |      | Emotionalisation/humanization of human-wildlife contact                                                                                           | 4              | median            |               |
|     |    |                                                                                    |                                                            |      | Lack of knowledge/ lack of education about wildlife                                                                                               | 5              | median            |               |
|     |    |                                                                                    |                                                            |      | Care or taking in of wild animals by non-professional persons                                                                                     | 4              | median            |               |
| C11 | OS | If necessary, do you consider the following measures to be justified to            | Matrix (Yes / Unsure / No)                                 | 1569 | <b>Measure</b>                                                                                                                                    | <b>yes (%)</b> | <b>unsure (%)</b> | <b>no (%)</b> |
|     |    |                                                                                    |                                                            |      | Feeding bans                                                                                                                                      | 68.5           | 14.9              | 16.7          |
|     |    |                                                                                    |                                                            |      | Containment through structural measure                                                                                                            | 41.8           | 33.0              | 25.2          |

|            |     |     |                                                                                                                                   |                 |      |                                                 |                                             |      |      |      |
|------------|-----|-----|-----------------------------------------------------------------------------------------------------------------------------------|-----------------|------|-------------------------------------------------|---------------------------------------------|------|------|------|
|            |     |     |                                                                                                                                   |                 |      | protect against wildlife damage in urban areas? | Scaring away by acoustic and visual stimuli | 41.6 | 27.0 | 31.4 |
|            |     |     |                                                                                                                                   |                 |      |                                                 | Relocation                                  | 48.3 | 32.7 | 19.1 |
|            |     |     |                                                                                                                                   |                 |      |                                                 | Containment through poisoning               | 7.0  | 11.5 | 81.5 |
|            |     |     |                                                                                                                                   |                 |      |                                                 | Containment through trapping/shooting       | 26.0 | 20.3 | 53.8 |
| Engagement | B13 | EnS | Have you ever been privately involved in native species conservation programs?                                                    | Multiple choice | 1569 | Yes, financially                                | 48.7%                                       |      |      |      |
|            |     |     |                                                                                                                                   |                 |      | Yes, voluntary work / active participation      | 45.8%                                       |      |      |      |
|            |     |     |                                                                                                                                   |                 |      | Yes, monitoring / observations                  | 39.1%                                       |      |      |      |
|            |     |     |                                                                                                                                   |                 |      | Yes, politically                                | 36.8%                                       |      |      |      |
|            |     |     |                                                                                                                                   |                 |      | No                                              | 18.2%                                       |      |      |      |
|            |     |     |                                                                                                                                   |                 |      | N/A                                             | 1.8%                                        |      |      |      |
|            | C13 | EnS | How much money would you be willing to pay to a veterinary practice/wildlife center for the care of a wild animal you have found? | Single choice   | 1569 | €0                                              | 6.8%                                        |      |      |      |
|            |     |     |                                                                                                                                   |                 |      | €0-10                                           | 5.3%                                        |      |      |      |
|            |     |     |                                                                                                                                   |                 |      | €10-50                                          | 33.7%                                       |      |      |      |
|            |     |     |                                                                                                                                   |                 |      | €50-100                                         | 27.9%                                       |      |      |      |
|            |     |     |                                                                                                                                   |                 |      | € >100                                          | 17.9%                                       |      |      |      |
|            |     |     |                                                                                                                                   |                 |      | N/A                                             | 8.4%                                        |      |      |      |
|            | C12 | EnS | To what extent would you be willing to get involved with                                                                          | Multiple choice | 1569 | Financially                                     | 49.3%                                       |      |      |      |
|            |     |     |                                                                                                                                   |                 |      | Voluntary work                                  | 71.6%                                       |      |      |      |
|            |     |     |                                                                                                                                   |                 |      | Politically                                     | 33.0%                                       |      |      |      |
|            |     |     |                                                                                                                                   |                 |      | Through further education                       | 60.3%                                       |      |      |      |

|                              |    |    |                                                                                                                   |                                                            |               |                                                   |       |
|------------------------------|----|----|-------------------------------------------------------------------------------------------------------------------|------------------------------------------------------------|---------------|---------------------------------------------------|-------|
|                              |    |    | native wildlife in the future?                                                                                    |                                                            |               | Own action in private space (e.g., garden design) | 88.7% |
|                              |    |    |                                                                                                                   |                                                            |               | None of these measures                            | 1.2%  |
|                              |    |    |                                                                                                                   |                                                            |               | N/A                                               | 1.8%  |
| Questionnaire for volunteers | F1 | -  | You have indicated that you care for wild animals. What are the three most common groups of animals you care for? | Multiple choice                                            | 671           | Canines (e.g., foxes, raccoon dogs)               | 10.9% |
|                              |    |    |                                                                                                                   |                                                            |               | Felines (e.g., lynxes, wildcats)                  | 2.8%  |
|                              |    |    |                                                                                                                   |                                                            |               | Lagomorpha (e.g., brown hares, wild rabbits)      | 17.0% |
|                              |    |    |                                                                                                                   |                                                            |               | Rodents (e.g., mice, dormice)                     | 25.8% |
|                              |    |    |                                                                                                                   |                                                            |               | Insectivores (e.g., hedgehogs)                    | 46.5% |
|                              |    |    |                                                                                                                   |                                                            |               | Songbirds (e.g., swallows, crows)                 | 51.3% |
|                              |    |    |                                                                                                                   |                                                            |               | Birds of prey (e.g., falcons, owls)               | 20.4% |
|                              |    |    |                                                                                                                   |                                                            |               | Waterfowl (e.g., ducks, geese)                    | 11.9% |
|                              |    |    |                                                                                                                   |                                                            |               | Bats                                              | 7.6%  |
|                              |    |    |                                                                                                                   |                                                            |               | Cloven-hoofed animals (e.g., roe deer, wild boar) | 13.6% |
|                              |    |    |                                                                                                                   |                                                            |               | Reptiles (e.g., lizards, turtles)                 | 3.3%  |
|                              |    |    |                                                                                                                   |                                                            |               | Amphibians (e.g., frogs, toads)                   | 6.6%  |
|                              |    |    |                                                                                                                   |                                                            |               | N/A                                               | 5.7%  |
|                              |    | F2 | -                                                                                                                 | How many wild animals do you care for per year on average? | Single choice | 666                                               | 0-10  |
|                              |    |    |                                                                                                                   |                                                            |               | 10-50                                             | 21.3% |
|                              |    |    |                                                                                                                   |                                                            |               | 50-100                                            | 11.9% |
|                              |    |    |                                                                                                                   |                                                            |               | 100-500                                           | 8.3%  |
|                              |    |    |                                                                                                                   |                                                            |               | >500                                              | 4.5%  |

|    |   |                                                                                        |                                                                                                                                                                          |     |                                                                  |          |
|----|---|----------------------------------------------------------------------------------------|--------------------------------------------------------------------------------------------------------------------------------------------------------------------------|-----|------------------------------------------------------------------|----------|
|    |   |                                                                                        |                                                                                                                                                                          |     | N/A                                                              | 9.6%     |
| F3 | - | How do you finance the care of the animals?                                            | Multiple choice                                                                                                                                                          | 671 | Donations                                                        | 28.5%    |
|    |   |                                                                                        |                                                                                                                                                                          |     | Private                                                          | 82.6%    |
|    |   |                                                                                        |                                                                                                                                                                          |     | Public support                                                   | 7.8%     |
|    |   |                                                                                        |                                                                                                                                                                          |     | N/A                                                              | 9.6%     |
| F4 | - | How high do you estimate the average financial expenditure per animal to be cared for? | Free text                                                                                                                                                                | 359 | Number field                                                     | €0-50    |
| F5 | - | How high do you estimate the average time expenditure per animal and day?              | Single choice                                                                                                                                                            | 664 | 0-60 minutes                                                     | 38.4%    |
|    |   |                                                                                        |                                                                                                                                                                          |     | 1-2 hours                                                        | 25.5%    |
|    |   |                                                                                        |                                                                                                                                                                          |     | 2-5 hours                                                        | 15.8%    |
|    |   |                                                                                        |                                                                                                                                                                          |     | 5-8 hours                                                        | 4.0%     |
|    |   |                                                                                        |                                                                                                                                                                          |     | >8 hours                                                         | 3.5%     |
|    |   |                                                                                        |                                                                                                                                                                          |     | N/A                                                              | 12.8%    |
| F6 | - | To what extent do the following issues affect your volunteer work?                     | Matrix: This does not affect my voluntary work at all (1) / this does not really affect my voluntary work (2) / this partly affects my voluntary work (3) / this affects | 644 | Lack of information/lack of knowledge on the part of the finders | 5 median |
|    |   |                                                                                        |                                                                                                                                                                          |     | Lack of financial support from authorities                       | 5 median |
|    |   |                                                                                        |                                                                                                                                                                          |     | Lack of cooperation from public authorities                      | 4 median |
|    |   |                                                                                        |                                                                                                                                                                          |     | Inadequate care by veterinarians                                 | 3 median |
|    |   |                                                                                        |                                                                                                                                                                          |     | Poor recognition of the activity                                 | 3 median |

|    |   |                                                                                                                         |                                                                      |     |                                                  |       |              |
|----|---|-------------------------------------------------------------------------------------------------------------------------|----------------------------------------------------------------------|-----|--------------------------------------------------|-------|--------------|
|    |   |                                                                                                                         | my voluntary work (4) / this affects my voluntary work very much (5) |     | Rising animal numbers                            | 4     | median       |
| F7 | - | Would you welcome mandatory accredited further training for volunteer wildlife carers?                                  | Single choice                                                        | 671 | Yes                                              | 81.7% |              |
|    |   |                                                                                                                         |                                                                      |     | No                                               | 14.2% |              |
|    |   |                                                                                                                         |                                                                      |     | N/A                                              | 4.2%  |              |
|    |   |                                                                                                                         |                                                                      |     |                                                  |       |              |
| F8 | - | What do you think should be improved most urgently in the future? Sort the sentences in descending order of importance. | Ranking 1-6                                                          | 671 | Educating the population about native wildlife   | 4.7   | average rank |
|    |   |                                                                                                                         |                                                                      |     | Training of veterinarians on native wild animals | 3.6   | average rank |
|    |   |                                                                                                                         |                                                                      |     | Financial support                                | 3.9   | average rank |
|    |   |                                                                                                                         |                                                                      |     | Cooperation with authorities                     | 2.9   | average rank |
|    |   |                                                                                                                         |                                                                      |     | Networking between veterinarians and volunteers  | 3.5   | average rank |
|    |   |                                                                                                                         |                                                                      |     | Simplification of the legal requirements         | 2.6   | average rank |

|           |    |   |                                                                                                                       |           |      |           |
|-----------|----|---|-----------------------------------------------------------------------------------------------------------------------|-----------|------|-----------|
| Free Text | D1 | - | What questions do you have regarding the problems in dealing with native wildlife that you think should be discussed? | Free text | 1569 | Free text |
|-----------|----|---|-----------------------------------------------------------------------------------------------------------------------|-----------|------|-----------|

**Table S2.** Variables used in the statistical model. Here, details on the variables shown in tables A2 and A3 are given.

| Variable      | Definition                    | Range                      | Categories                                                                                                                                                                                                                                                                                                     |
|---------------|-------------------------------|----------------------------|----------------------------------------------------------------------------------------------------------------------------------------------------------------------------------------------------------------------------------------------------------------------------------------------------------------|
| Gender (GE)   | male, female, diverse         | male, female, diverse, N/A |                                                                                                                                                                                                                                                                                                                |
| Age (A)       | year of birth of participants | 1938-2006                  | -                                                                                                                                                                                                                                                                                                              |
| Residence (R) | town residence                | -                          | <ul style="list-style-type: none"><li>a (&lt;5000 inhabitants)</li><li>b (5000 ≤10,000 inhabitants)</li><li>c (10,000 ≤20,000 inhabitants)</li><li>d (20,000 ≤50,000 inhabitants)</li><li>e (50,000 ≤100,000 inhabitants)</li><li>f (100,000 ≤500,000 inhabitants)</li><li>g (≥ 500,000 inhabitants)</li></ul> |

|                                     |                        |   |                                                                                                                                                                                                                                                                                               |
|-------------------------------------|------------------------|---|-----------------------------------------------------------------------------------------------------------------------------------------------------------------------------------------------------------------------------------------------------------------------------------------------|
| <b>Professional Engagement (PE)</b> | field of activity      | - | <ul style="list-style-type: none"> <li>▪ A (local authority)</li> <li>▪ B (hunting/forestry authority)</li> <li>▪ C (agriculture)</li> <li>▪ D (nature conservation)</li> <li>▪ E (scientific research)</li> <li>▪ F (veterinary medicine)</li> <li>▪ G (N/A)</li> <li>▪ H (other)</li> </ul> |
| <b>Voluntary Engagement (VE)</b>    | engaged with animals   |   | yes / no                                                                                                                                                                                                                                                                                      |
| <b>Hunting Engagement (HE)</b>      | hunting license holder |   | <ul style="list-style-type: none"> <li>▪ A (yes, not active)</li> <li>▪ B (yes, professional)</li> <li>▪ C (yes, voluntarily)</li> <li>▪ D (N/A)</li> <li>▪ E (no)</li> </ul>                                                                                                                 |



**Evaluation of risks:**

|                                          |     |
|------------------------------------------|-----|
| Habitat crossover (RH)                   | 1-5 |
| Human wildlife interaction (RI)          | 1-5 |
| Disease transmission (RD)                | 1-5 |
| Fear / prejudice (RF)                    | 1-5 |
| Emotionalization / humanization (RE)     | 1-5 |
| Lack of knowledge (RL)                   | 1-5 |
| Wildlife care by non-professionals (RNP) | 1-5 |

|                        |                             |          |   |
|------------------------|-----------------------------|----------|---|
| Emotion Score (EmS)    | Consists of two questions   | -28 – 28 | - |
| Engagement-Score (EnS) | Consists of three questions | -1 – 10  | - |
| Experience-Score (ExS) | Consists of three questions | -4 – 17  | - |
| Knowledge-Score (KS)   | Consists of four questions  | 0 – 14   | - |
| Opinion-Score (OS)     | Consists of two questions   | -14 – 14 | - |

**Table S3.** Grouped wildlife species for wildlife survey dataset

|                           |                                                                                                                                                                                                                                                          |
|---------------------------|----------------------------------------------------------------------------------------------------------------------------------------------------------------------------------------------------------------------------------------------------------|
| <b>Geese and ducks</b>    | Greylag goose ( <i>Anser anser</i> ), Canada goose ( <i>Branta canadensis</i> ), Egyptian goose ( <i>Alopochen aegyptiaca</i> ), Eurasian wigeon ( <i>Mareca penelope</i> ), Eurasian teal ( <i>Anas crecca</i> ), mallard ( <i>Anas platyrhynchos</i> ) |
| <b>Cloven-hoofed game</b> | European fallow deer ( <i>Dama dama</i> ), European mouflon ( <i>Ovis gmelini musimon</i> ), roe deer ( <i>Capreolus capreolus</i> ), red deer ( <i>Cervus elaphus</i> ), wild boar ( <i>Sus scrofa</i> )                                                |
| <b>Neozoa</b>             | Coypu ( <i>Myocastor coypus</i> ), raccoon ( <i>Procyon lotor</i> ), raccoon dog ( <i>Nyctereutes procyonoides</i> ), American mink ( <i>Neogale vison</i> ), Canada goose ( <i>Branta canadensis</i> ), Egyptian goose ( <i>Alopochen aegyptiaca</i> )  |

|                                         |                                                                                                                                                                                                                                                                                                                                                                                                                                                                                                                                                                                                                                                                                                       |
|-----------------------------------------|-------------------------------------------------------------------------------------------------------------------------------------------------------------------------------------------------------------------------------------------------------------------------------------------------------------------------------------------------------------------------------------------------------------------------------------------------------------------------------------------------------------------------------------------------------------------------------------------------------------------------------------------------------------------------------------------------------|
| <b>Birds</b>                            | Eurasian magpie ( <i>Pica pica</i> ), Common raven ( <i>Corvus corax</i> ), Carrion crow ( <i>Corvus corone</i> ), pheasant ( <i>Phasianus colchicus</i> ), Grey partridge ( <i>Perdix perdix</i> ), Greylag goose ( <i>Anser anser</i> ), Canada goose ( <i>Branta canadensis</i> ), Egyptian goose ( <i>Alopochen aegyptiaca</i> ), Eurasian wigeon ( <i>Mareca penelope</i> ), Eurasian teal ( <i>Anas crecca</i> ), mallard ( <i>Anas platyrhynchos</i> ), Eurasian collared dove ( <i>Streptopelia decaocto</i> ), wood pigeon ( <i>Columba palumbus</i> )                                                                                                                                       |
| <b>Mammals</b>                          | European hare ( <i>Lepus europaeus</i> ), European rabbit ( <i>Oryctolagus cuniculus</i> ), red fox ( <i>Vulpes vulpes</i> ), European badger ( <i>Meles meles</i> ), coypu ( <i>Myocastor coypus</i> ), Eurasian beaver ( <i>Castor fiber</i> ), raccoon ( <i>Procyon lotor</i> ), raccoon dog ( <i>Nyctereutes procyonoides</i> ), American mink ( <i>Neogale vison</i> ), European wildcat ( <i>Felis silvestris</i> ), wolf ( <i>Canis lupus</i> ), Eurasian lynx ( <i>Lynx lynx</i> ), European fallow deer ( <i>Dama dama</i> ), European mouflon ( <i>Ovis gmelini musimon</i> ), roe deer ( <i>Capreolus capreolus</i> ), red deer ( <i>Cervus elaphus</i> ), wild boar ( <i>Sus scrofa</i> ) |
| <b>Predatory mammals</b>                | Red fox ( <i>Vulpes vulpes</i> ), European badger ( <i>Meles meles</i> ), raccoon dog ( <i>Nyctereutes procyonoides</i> ), Raccoon ( <i>Procyon lotor</i> ), mink ( <i>Neogale vison</i> ), European wildcat ( <i>Felis silvestris</i> ), wolf ( <i>Canis lupus</i> ), Eurasian lynx ( <i>Lynx lynx</i> )                                                                                                                                                                                                                                                                                                                                                                                             |
| <b>Species under special protection</b> | Eurasian beaver ( <i>Castor fiber</i> ), European wildcat ( <i>Felis silvestris</i> ), wolf ( <i>Canis lupus</i> ), Eurasian lynx ( <i>Lynx lynx</i> )                                                                                                                                                                                                                                                                                                                                                                                                                                                                                                                                                |
| <b>Management species (city)</b>        | Carrion crow ( <i>Corvus corone</i> ), European rabbit ( <i>Oryctolagus cuniculus</i> ), red fox ( <i>Vulpes vulpes</i> ), coypu ( <i>Myocastor coypus</i> ), raccoon ( <i>Procyon lotor</i> ), wild boar ( <i>Sus scrofa</i> )                                                                                                                                                                                                                                                                                                                                                                                                                                                                       |
